# Supplementary material for: Deep-subwavelength control of acoustic waves in an ultra-compact metasurface lens
Source: PubMed Central journal article supplement (PMC6250707; doi:10.1038/s41467-018-07315-6), 2018-11-22
Supplement: 41467_2018_7315_MOESM1_ESM.pdf [file 41467_2018_7315_MOESM1_ESM.pdf]

## **Supplementary Information**

### **Deep-subwavelength control of acoustic waves in an ultra-compact metasurface lens**

Chen et al.

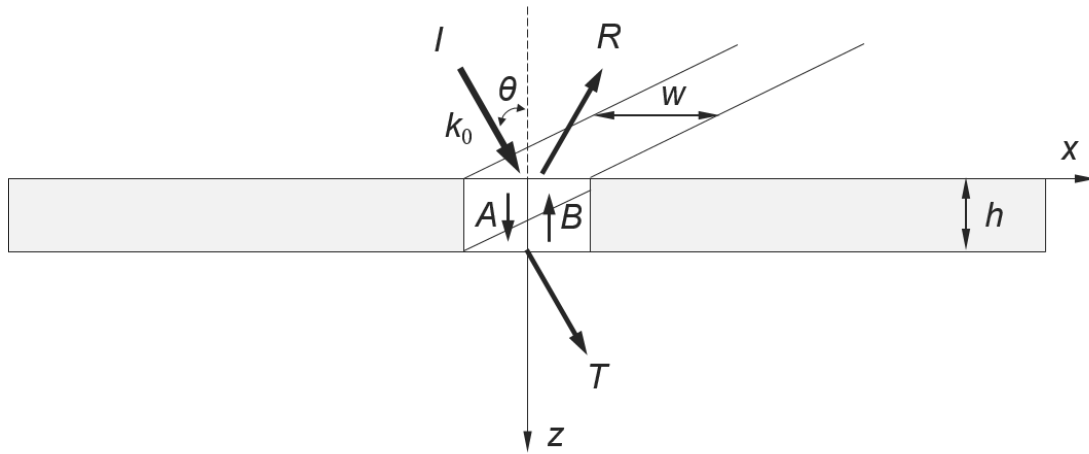

**Supplementary Figure 1** | Schematic diagram of wave interactions with a subwavelength slit. The slit has a rectangular cross-section with width  $w$  and thickness  $h$ . The pressure field of incident waves is normalized to 1 Pa.

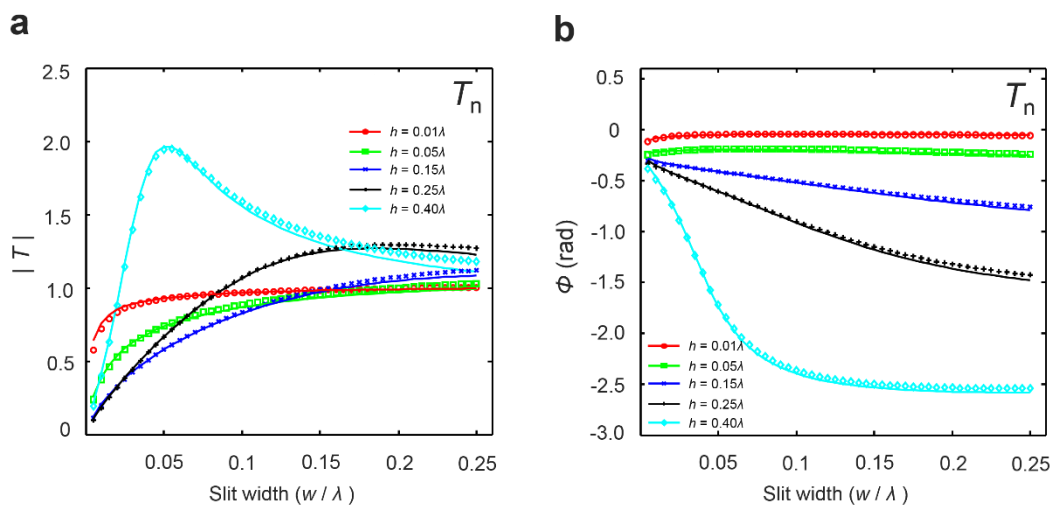

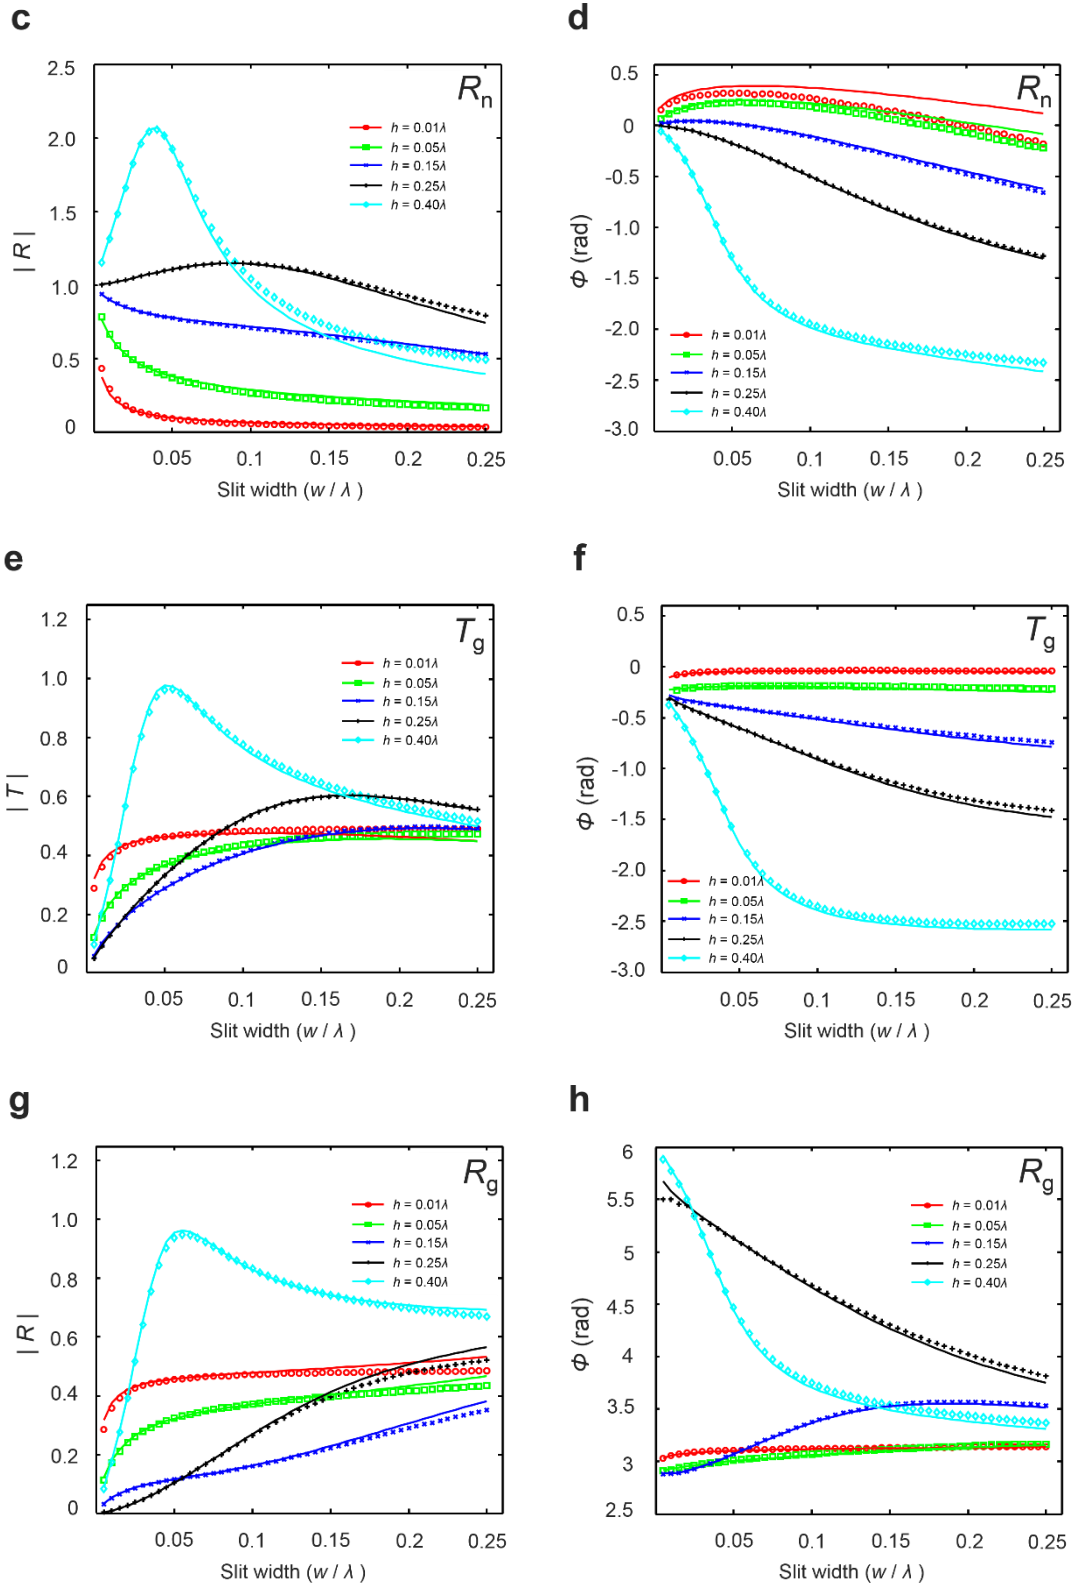

**Supplementary Figure 2** | The comparisons of transmission and reflection coefficients of a single slit between theoretical calculations (solid lines) and numerical simulations (marks). The calculation and simulation for (a, b)  $T_n$ , (c, d)  $R_n$ , (e, f)  $T_g$  and (g, h)  $R_g$  are carried out on different slit parameters. The slit width increases from  $0.005\lambda$  to  $0.25\lambda$  with a step of  $0.005\lambda$  at different thicknesses ( $h = 0.01\lambda, 0.05\lambda, 0.15\lambda, 0.25\lambda, 0.4\lambda$ ).

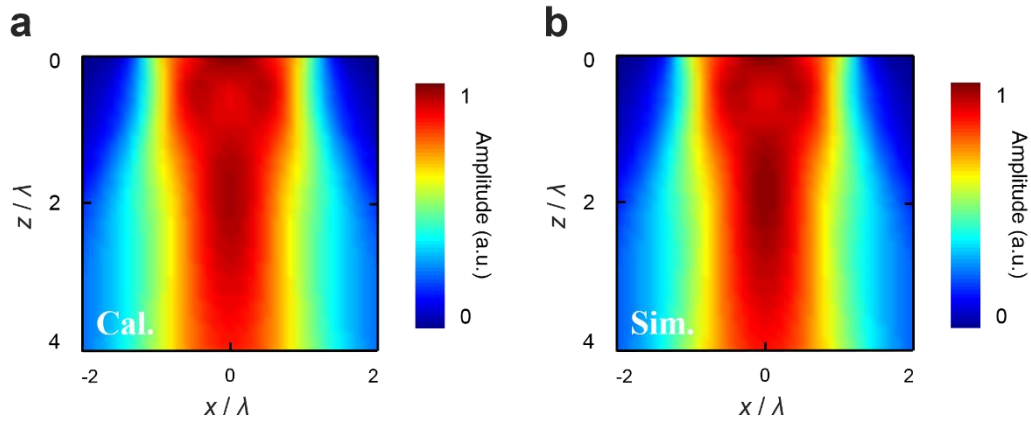

**Supplementary Figure 3** | (a) Calculated and (b) simulated pressure field after a plane wave transmits through a user-defined acoustic metasurface. The thickness, spacing, and slit number in the acoustic metasurface are  $0.1\lambda$ ,  $0.15\lambda$  and 19, respectively. The slit widths decrease from  $0.1\lambda$  to  $0.01\lambda$  with a step of  $0.01\lambda$  from the center to the side.

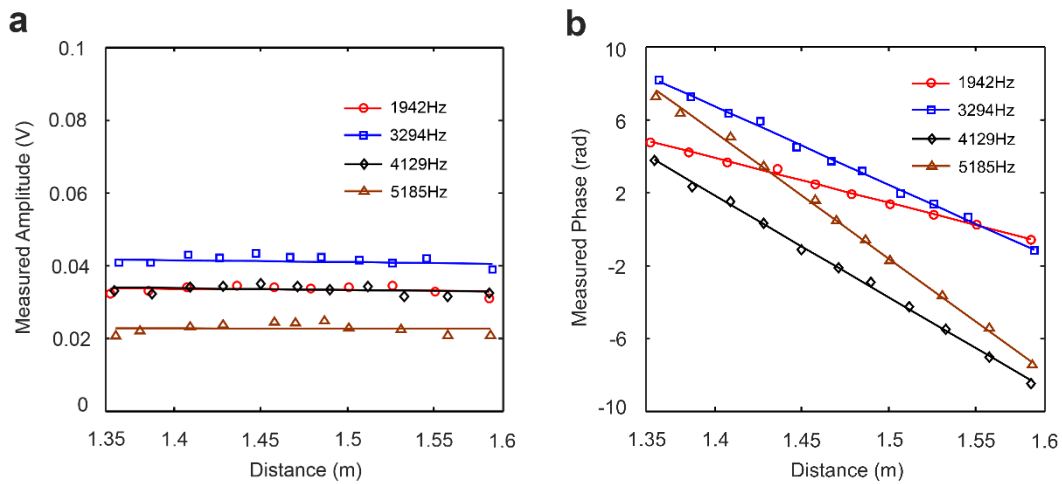

**Supplementary Figure 4** | (a) The amplitude and (b) phase of the acoustic signals generated by the plane wave speaker at selected frequencies: 1942Hz (circles), 3294Hz (squares), 4129Hz (diamonds) and 5185Hz (triangles). The measurements were performed along the  $45^\circ$  diagonal path in front of the speaker on which the microphone slides. The distance of the measurement locations was recorded with respect to a reference point on the frame diagonal. The measured phase data was fitted using linear least squares, and the parameters are listed in Supplementary table 3.

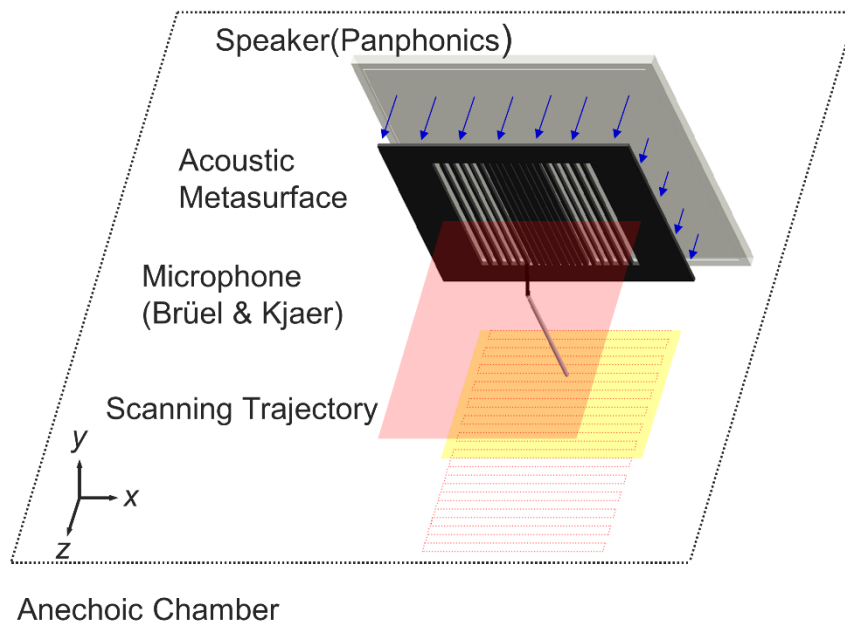

**Supplementary Figure 5** | Schematic of the experimental setup for acoustic field measurements.

|                              |             |             |             |             |             |             |             |             |             |            |
|------------------------------|-------------|-------------|-------------|-------------|-------------|-------------|-------------|-------------|-------------|------------|
| $m$                          | 1           | 2           | 3           | 4           | 5           | 6           | 7           | 8           | 9           | 10         |
| slit width ( $0.01\lambda$ ) | <b>14.1</b> | <b>12.3</b> | <b>12.6</b> | <b>12.6</b> | <b>11.9</b> | <b>7.0</b>  | <b>3.0</b>  | <b>2.0</b>  | <b>2.0</b>  | <b>2.1</b> |
| $m$                          | 11          | 12          | 13          | 14          | 15          | 16          | 17          | 18          | 19          |            |
| slit width ( $0.01\lambda$ ) | <b>2.0</b>  | <b>2.0</b>  | <b>3.0</b>  | <b>7.0</b>  | <b>11.9</b> | <b>12.6</b> | <b>12.6</b> | <b>12.3</b> | <b>14.1</b> |            |

**Supplementary Table 1:** Optimized slit widths of the acoustic metasurface lens for far-field sound focusing.

|                              |            |             |             |             |             |             |             |             |             |             |            |
|------------------------------|------------|-------------|-------------|-------------|-------------|-------------|-------------|-------------|-------------|-------------|------------|
| $m$                          | 1          | 2           | 3           | 4           | 5           | 6           | 7           | 8           | 9           | 10          | 11         |
| slit width ( $0.01\lambda$ ) | <b>0.3</b> | <b>0.32</b> | <b>0.34</b> | <b>5.32</b> | <b>1.58</b> | <b>8.94</b> | <b>1.58</b> | <b>5.32</b> | <b>0.34</b> | <b>0.32</b> | <b>0.3</b> |

**Supplementary Table 2:** Optimized slit widths of the near-field metasurface lens.

---

| Frequency (Hz) | Theoretical phase slope (rad m <sup>-1</sup> ) | Experimental phase slope (rad m <sup>-1</sup> ) | $R^2$ value |
|----------------|------------------------------------------------|-------------------------------------------------|-------------|
| 1942           | -25.15                                         | -24.47                                          | 0.9954      |
| 3294           | -42.67                                         | -43.13                                          | 0.9981      |
| 4129           | -53.48                                         | -56.02                                          | 0.9986      |
| 5185           | -67.16                                         | -67.06                                          | 0.9969      |

---

**Supplementary Table 3:** The linear least square fitting parameters of the measured phases.

## Supplementary Note 1. The Derivation of transmission and reflection coefficients

Consider an amplitude-normalized plane wave with a tangential component of wave-vector  $\alpha_0$  incident on a rigid plate, as shown in Supplementary Fig. 1. The slit has a rectangular cross-section with width  $w$  and thickness  $h$ . Under this insonification, the expression of the pressure field above and below the slit can be, respectively, written as

$$P_a = P_t + P_r = e^{i\alpha_0 x + i\eta_0 z} + \int_{-\infty}^{+\infty} R(\alpha) e^{i\alpha x - i\eta z} d\alpha \quad (\text{A.1})$$

and

$$P_b = P_t = \int_{-\infty}^{+\infty} T(\alpha) e^{i\alpha x + i\eta(z-h)} d\alpha, \quad (\text{A.2})$$

where  $i = \sqrt{-1}$ ,  $\eta_0 = \sqrt{k_0^2 - \alpha_0^2}$  is the  $z$  component of the incident-wave vector,  $\alpha$  and  $\eta = \sqrt{k_0^2 - \alpha^2}$  are the wave vectors of high-order diffraction along  $x$  and  $z$  directions, respectively;  $k_0 = \omega / c$  is the wave-vector of the incident wave in air ( $\omega$  is the angular frequency and  $c$  is the acoustic velocity in air);  $R(\alpha)$  and  $T(\alpha)$  are the reflection and transmission coefficients, respectively. By making Fourier transforms of each waveguide modes,  $R(\alpha)$  and  $T(\alpha)$  can be expanded as<sup>1</sup>

$$R(\alpha) = \delta(\alpha - \alpha_0) + \sum_{j \geq 0} R_j W_j(\alpha) / \eta \quad (\text{A.3})$$

$$T(\alpha) = \sum_{j \geq 0} T_j W_j(\alpha) / \eta, \quad (\text{A.4})$$

where  $\delta$  is the Dirac delta function, and

$$W_j(\alpha) = \int_{-w/2}^{w/2} e^{-i\alpha x} \cos\left(\frac{j\pi}{w} x\right) dx. \quad (\text{A.5})$$

Inside the slit, the pressure field is also expanded in terms of the waveguide modes, which is expressed as

$$P_{\text{in}} = \sum_{j \geq 0} \cos\left(\frac{j\pi}{w} x\right) [A_j e^{i\sqrt{k_0^2 - (\frac{j\pi}{w})^2} z} + B_j e^{-i\sqrt{k_0^2 - (\frac{j\pi}{w})^2} z}] \quad (\text{A.6})$$

where  $A_j$  and  $B_j$  are the pressure amplitudes of the forward and backward waves of  $j$ -th waveguide mode, and  $j$  is a positive integer.

In the case of a subwavelength slit, the pressure field can be sufficiently well described by the first term in the mode expansions (this means that only the fundamental mode ( $j = 0$ ) is retained)<sup>1</sup>. Therefore, Supplementary equations 1-6 can be simplified to

$$\begin{cases} P_a = e^{i\alpha_0 x + i\eta_0 z} + e^{i\alpha_0 x - i\eta_0 z} + \int_{-\infty}^{+\infty} \frac{R_0 W_0(\alpha)}{\eta} e^{i\alpha x - i\eta z} d\alpha \\ P_{in} = A_0 e^{ik_0 z} + B_0 e^{-ik_0 z} \\ P_b = \int_{-\infty}^{+\infty} \frac{T_0 W_0(\alpha)}{\eta} e^{i\alpha x + i\eta(z-h)} d\alpha \end{cases} \quad (\text{A.7-1})$$

with  $W_0(\alpha) = \int_{-w/2}^{w/2} e^{-i\alpha x} dx = \frac{2 \sin(w\alpha/2)}{\alpha}$ .

The normal velocities can then be obtained from  $u = \frac{1}{i\rho\omega} \frac{\partial p}{\partial z}$ , and thus we have

$$\begin{cases} u_a = \frac{1}{\rho\omega} (\eta_0 e^{i\alpha_0 x + i\eta_0 z} - \eta_0 e^{i\alpha_0 x - i\eta_0 z} - \int_{-\infty}^{+\infty} R_0 W_0(\alpha) e^{i\alpha x - i\eta z} d\alpha) \\ u_{in} = \frac{k_0}{\rho\omega} (A_0 e^{ik_0 z} - B_0 e^{-ik_0 z}) \\ u_b = \frac{1}{\rho\omega} \left( \int_{-\infty}^{+\infty} T_0 W_0(\alpha) e^{i\alpha x + i\eta(z-h)} d\alpha \right) \end{cases} \quad (\text{A.7-2})$$

where  $\rho$  is the mass density of air. According to the boundary conditions, the pressure field and normal velocity at the interfaces (i.e.,  $z = 0$  and  $z = h$ ) should be continuous. Combining the continuity conditions with Supplementary equation 7, we can determine the coefficients  $R_0$ ,  $T_0$ ,  $A_0$ , and  $B_0$ .

Firstly, we calculate the transmission and reflection coefficients [ $T_n$  and  $R_n$ ] for a normally incident plane wave. Under the normal incidence ( $\theta = 0$ ), we have  $\alpha_0 (=k_0 \sin\theta) = 0$  and  $\eta_0 = k_0$ . By substituting the initial conditions to Supplementary equation 7 and applying the boundary conditions at  $z = 0$ , we obtain

$$\begin{cases} 2 + \int_{-\infty}^{+\infty} \frac{R_0 W_0(\alpha)}{\eta} e^{i\alpha x} d\alpha = A_0 + B_0 \\ \int_{-\infty}^{+\infty} R_0 W_0(\alpha) e^{i\alpha x} d\alpha = -k_0 (A_0 - B_0) \end{cases} \quad (\text{A.8-1})$$

Similarly, at  $z = h$

$$\begin{cases} \int_{-\infty}^{+\infty} \frac{T_0 W_0(\alpha)}{\eta} e^{i\alpha x} d\alpha = A_0 e^{ik_0 h} + B_0 e^{-ik_0 h} \\ \int_{-\infty}^{+\infty} T_0 W_0(\alpha) e^{i\alpha x} d\alpha = k_0 (A_0 e^{ik_0 h} - B_0 e^{-ik_0 h}) \end{cases} \quad (\text{A.8-2})$$

Note that although the slits are deep-subwavelength compared to the incident wave, they cannot be simply considered as points for all waves, especially the evanescent waves with large tangential wave-vectors. As the integration is performed for all wave components over  $[-\infty, \infty]$ , here we generalize the evaluation of  $e^{i\alpha x}$  by averaging it on the whole slit width, to integrate out the  $x$



dependence. Thus, we have  $e^{i\alpha x} \approx \frac{1}{w} \int_{-w/2}^{w/2} e^{i\alpha x} dx = \frac{2 \sin(w\alpha/2)}{\alpha w}$ . Substituting  $e^{i\alpha x}$  and

$W_0(\alpha) = \frac{2 \sin(w\alpha/2)}{\alpha}$  into Supplementary equation 8, we therefore have

$$\begin{cases} T_n = \int_{-\infty}^{\infty} \frac{T_0 W_0(\alpha)}{\eta} e^{i\alpha x} d\alpha = \frac{4Qe^{ik_0 h}}{(Q+1)^2 - (Q-1)^2 e^{2ik_0 h}} \\ R_n = 1 + \int_{-\infty}^{\infty} \frac{R_0 W_0(\alpha)}{\eta} e^{i\alpha x} d\alpha = \frac{Q-1}{Q+1} (T_n e^{ik_0 h} - 1) \end{cases} \quad (\text{A.9})$$

with  $Q = \frac{k_0}{\pi w} \int_{-\infty}^{\infty} \frac{1 - \cos(w\alpha)}{\alpha^2 \sqrt{k_0^2 - \alpha^2}} d\alpha$ .

Similar calculations are implemented to the grazing incidence by changing the initial conditions to  $\alpha_0 = k_0$  and  $\eta_0 = 0$ , and finally we get

$$\begin{cases} T_g = \frac{2Qe^{ik_0 h} \text{sinc}(k_0 w/2)}{(Q+1)^2 - (Q-1)^2 e^{2ik_0 h}} \\ R_g = \frac{T_g e^{ik_0 h} (Q-1) + \text{sinc}(k_0 w/2)}{Q+1} - 1 \end{cases} \quad (\text{A.10})$$

## **Supplementary Note 2. Characteristic parameters of the cylindrical waves (CWs)**

Under uniform illumination by a (normal or grazing) plane wave, the acoustic wave scattered by a subwavelength slit can be regarded as a new point source that thus generates a CW. The excited CW can be characterized by two coefficients,  $\beta$  and  $\phi$ . To extract the coefficients, a two-step procedure is adopted. Firstly, the pressure field is extracted through a numerical simulation. Then, using Eq. (1) in the main text, the coefficients are optimized by fitting the pressure field distribution over an interval ( $w/2 \leq r \leq 10\lambda$ ). This procedure offers a rigorous numerical approach to calculate  $\beta$  and  $\phi$ , and similar calculations are performed for different slit parameters. The slit width increases from  $0.005\lambda$  to  $0.2\lambda$  with a step of  $0.005\lambda$  at different thicknesses ( $h = 0.05\lambda, 0.1\lambda, 0.3\lambda, 0.7\lambda, 0.9\lambda$ ). The calculated  $\beta$  and  $\phi$  for different slits are provided in the Source Data file. From these calculations, it can be found that both  $\beta$  and  $\phi$  are relying on the slit width  $w$ , but independent of thickness  $h$ . To determine the relationship between the CWs and the slit parameters,  $\beta$  and  $\phi$  are fitted as a polynomial function of slit width with the least-mean-square method.

## **Supplementary References**

1. Takakura, Y. Optical resonance in a narrow slit in a thick metallic screen. *Phys. Rev. Lett.* 86, 5601 (2001).
