# Supplementary material for: Deep-subwavelength control of acoustic waves in an ultra-compact metasurface lens
Source: PubMed Central journal article supplement (PMC6250707; doi:10.1038/s41467-018-07315-6), 2018-11-22
Supplement: 41467_2018_7315_MOESM3_ESM.pdf [file 41467_2018_7315_MOESM3_ESM.pdf]

The fitted  $\beta$  and  $\phi$  for different slit parameters

| $w$             | $h = 0.05\lambda$ |        | $h = 0.1\lambda$ |        | $h = 0.3\lambda$ |        | $h = 0.7\lambda$ |        | $h = 0.9\lambda$ |        |
|-----------------|-------------------|--------|------------------|--------|------------------|--------|------------------|--------|------------------|--------|
|                 | $\beta$           | $\phi$ | $\beta$          | $\phi$ | $\beta$          | $\phi$ | $\beta$          | $\phi$ | $\beta$          | $\phi$ |
| 0.005 $\lambda$ | 0.29              | -1.26  | 0.3              | -1.26  | 0.3              | -1.27  | 0.3              | -1.27  | 0.3              | -1.27  |
| 0.010 $\lambda$ | 0.34              | -1.22  | 0.34             | -1.22  | 0.34             | -1.23  | 0.34             | -1.22  | 0.34             | -1.23  |
| 0.015 $\lambda$ | 0.37              | -1.19  | 0.37             | -1.19  | 0.37             | -1.19  | 0.37             | -1.19  | 0.37             | -1.2   |
| 0.020 $\lambda$ | 0.39              | -1.16  | 0.39             | -1.16  | 0.39             | -1.17  | 0.39             | -1.16  | 0.39             | -1.17  |
| 0.025 $\lambda$ | 0.41              | -1.14  | 0.41             | -1.14  | 0.41             | -1.14  | 0.41             | -1.14  | 0.41             | -1.15  |
| 0.030 $\lambda$ | 0.43              | -1.12  | 0.43             | -1.12  | 0.43             | -1.12  | 0.43             | -1.12  | 0.42             | -1.12  |
| 0.035 $\lambda$ | 0.45              | -1.1   | 0.45             | -1.1   | 0.44             | -1.1   | 0.44             | -1.1   | 0.44             | -1.1   |
| 0.040 $\lambda$ | 0.46              | -1.08  | 0.46             | -1.08  | 0.46             | -1.09  | 0.46             | -1.08  | 0.45             | -1.07  |
| 0.045 $\lambda$ | 0.48              | -1.06  | 0.47             | -1.06  | 0.47             | -1.07  | 0.47             | -1.07  | 0.46             | -1.05  |
| 0.050 $\lambda$ | 0.49              | -1.05  | 0.49             | -1.05  | 0.48             | -1.05  | 0.49             | -1.05  | 0.48             | -1.03  |
| 0.055 $\lambda$ | 0.5               | -1.03  | 0.5              | -1.03  | 0.49             | -1.04  | 0.5              | -1.04  | 0.49             | -1.01  |
| 0.060 $\lambda$ | 0.51              | -1.02  | 0.51             | -1.02  | 0.5              | -1.02  | 0.51             | -1.02  | 0.5              | -0.99  |
| 0.065 $\lambda$ | 0.52              | -1     | 0.52             | -1     | 0.51             | -1     | 0.52             | -1.01  | 0.52             | -0.98  |
| 0.070 $\lambda$ | 0.53              | -0.99  | 0.53             | -0.99  | 0.52             | -0.99  | 0.53             | -0.99  | 0.53             | -0.96  |
| 0.075 $\lambda$ | 0.54              | -0.97  | 0.54             | -0.98  | 0.53             | -0.97  | 0.54             | -0.98  | 0.54             | -0.95  |
| 0.080 $\lambda$ | 0.55              | -0.96  | 0.55             | -0.96  | 0.54             | -0.96  | 0.55             | -0.97  | 0.55             | -0.94  |
| 0.085 $\lambda$ | 0.56              | -0.95  | 0.56             | -0.95  | 0.55             | -0.95  | 0.56             | -0.95  | 0.56             | -0.92  |
| 0.090 $\lambda$ | 0.57              | -0.94  | 0.57             | -0.94  | 0.56             | -0.93  | 0.57             | -0.94  | 0.57             | -0.91  |
| 0.095 $\lambda$ | 0.58              | -0.92  | 0.58             | -0.93  | 0.57             | -0.92  | 0.57             | -0.93  | 0.58             | -0.9   |
| 0.100 $\lambda$ | 0.59              | -0.91  | 0.59             | -0.91  | 0.58             | -0.9   | 0.58             | -0.92  | 0.59             | -0.89  |
| 0.105 $\lambda$ | 0.6               | -0.9   | 0.59             | -0.9   | 0.58             | -0.89  | 0.59             | -0.9   | 0.6              | -0.88  |
| 0.110 $\lambda$ | 0.6               | -0.89  | 0.6              | -0.89  | 0.59             | -0.88  | 0.6              | -0.89  | 0.6              | -0.86  |
| 0.115 $\lambda$ | 0.61              | -0.88  | 0.61             | -0.88  | 0.6              | -0.86  | 0.6              | -0.88  | 0.61             | -0.85  |
| 0.120 $\lambda$ | 0.62              | -0.86  | 0.62             | -0.87  | 0.61             | -0.85  | 0.61             | -0.87  | 0.62             | -0.84  |
| 0.125 $\lambda$ | 0.63              | -0.85  | 0.62             | -0.86  | 0.61             | -0.84  | 0.62             | -0.86  | 0.63             | -0.83  |
| 0.130 $\lambda$ | 0.63              | -0.84  | 0.63             | -0.85  | 0.62             | -0.83  | 0.62             | -0.85  | 0.64             | -0.82  |
| 0.135 $\lambda$ | 0.64              | -0.83  | 0.64             | -0.83  | 0.63             | -0.81  | 0.63             | -0.83  | 0.64             | -0.81  |
| 0.140 $\lambda$ | 0.65              | -0.82  | 0.64             | -0.82  | 0.63             | -0.8   | 0.64             | -0.82  | 0.65             | -0.8   |
| 0.145 $\lambda$ | 0.65              | -0.81  | 0.65             | -0.81  | 0.64             | -0.79  | 0.64             | -0.81  | 0.66             | -0.79  |
| 0.150 $\lambda$ | 0.66              | -0.8   | 0.66             | -0.8   | 0.65             | -0.78  | 0.65             | -0.8   | 0.66             | -0.78  |
| 0.155 $\lambda$ | 0.67              | -0.79  | 0.66             | -0.79  | 0.65             | -0.77  | 0.65             | -0.79  | 0.67             | -0.77  |
| 0.160 $\lambda$ | 0.67              | -0.78  | 0.67             | -0.78  | 0.66             | -0.76  | 0.66             | -0.78  | 0.67             | -0.76  |
| 0.165 $\lambda$ | 0.68              | -0.77  | 0.67             | -0.77  | 0.67             | -0.75  | 0.66             | -0.77  | 0.68             | -0.75  |
| 0.170 $\lambda$ | 0.68              | -0.76  | 0.68             | -0.76  | 0.67             | -0.74  | 0.67             | -0.76  | 0.69             | -0.74  |
| 0.175 $\lambda$ | 0.69              | -0.75  | 0.68             | -0.75  | 0.68             | -0.73  | 0.67             | -0.75  | 0.69             | -0.73  |
| 0.180 $\lambda$ | 0.69              | -0.74  | 0.69             | -0.74  | 0.68             | -0.72  | 0.68             | -0.74  | 0.7              | -0.72  |
| 0.185 $\lambda$ | 0.7               | -0.73  | 0.69             | -0.73  | 0.69             | -0.71  | 0.68             | -0.72  | 0.7              | -0.71  |
| 0.190 $\lambda$ | 0.7               | -0.72  | 0.7              | -0.72  | 0.69             | -0.7   | 0.69             | -0.71  | 0.71             | -0.7   |
| 0.195 $\lambda$ | 0.71              | -0.71  | 0.7              | -0.71  | 0.7              | -0.69  | 0.69             | -0.7   | 0.71             | -0.69  |
| 0.200 $\lambda$ | 0.71              | -0.7   | 0.71             | -0.7   | 0.7              | -0.68  | 0.7              | -0.69  | 0.72             | -0.68  |
